# Supplementary material
Source: Springer Nature journal article supplement (https://www.springermedizin.de/resource/supplementary/12950_2013_362_MOESM1_ESM.pdf/9557662)

|                       |   |   |   |   |   |   |   |   |   |   |   |   |   |
|-----------------------|---|---|---|---|---|---|---|---|---|---|---|---|---|
| PGN                   | - | + | - | - | - | + | - | - | - | - | - | - | - |
| LPS                   | - | - | + | - | - | - | + | - | - | - | - | + | + |
| Hsp70                 | - | - | - | - | - | - | - | + | + | + | + | - | - |
| iTLR2                 | - | - | - | + | - | + | - | - | + | - | + | - | - |
| iTLR4                 | - | - | - | - | + | - | + | + | - | - | + | - | - |
| Cold NF-kB probe      | - | - | - | - | - | - | - | - | - | - | - | + | - |
| Cold irrelevant probe | - | - | - | - | - | - | - | - | - | - | - | - | + |

NF-kB

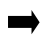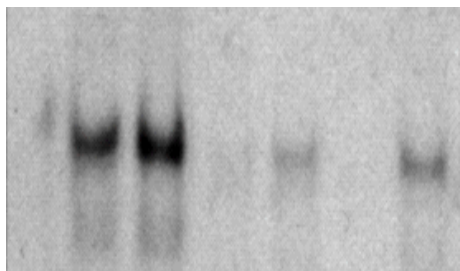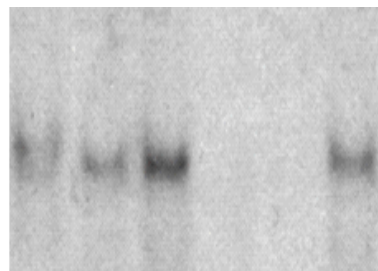

Supplement: MOESM1 [file 9557662]
